# Supplementary material for: Ladder Polyphenylsilsesquioxanes and Their Niobium–Siloxane Composite as Coating Materials: Spectroscopy and Atomic Oxygen Resistance Study
Source: MDPI journal article supplement (doi:10.3390/polym15153299), 2023-08-04
Supplement: s1 [file s1]

# Ladder Polyphenylsilsesquioxanes and Their Niobium–Siloxane Composite as Coating Materials: Spectroscopy and Atomic Oxygen Resistance Study

Ulyana S. Andropova <sup>1</sup>, Rinat R. Aysin <sup>1,\*</sup>, Olga A. Serenko <sup>1,\*</sup>, Tatyana O. Ershova <sup>1</sup>, Anton A. Anisimov <sup>1</sup> and Vladimir N. Chernik <sup>2</sup>

<sup>1</sup> A. N. Nesmeyanov Institute of Organoelement Compounds, Russian Academy of Sciences, 119991 Moscow, Russia; andropova@ispm.ru (U.S.A.); ershovatatyana\_2995@mail.ru (T.O.E.); anisimov.ineos@gmail.com (A.A.A.)

<sup>2</sup> D. V. Skobeltsyn Institute of Nuclear Physics, Lomonosov Moscow State University, 119234 Moscow, Russia; chernik@sinp.msu.ru

\* Correspondence: aysin@ineos.ac.ru (R.R.A.); o\_serenko@ineos.ac.ru (O.A.S.)

**Table S1.** Transmission coefficients  $\tau_{vis}$  and  $\tau_D$  normalized to thickness 25  $\mu\text{m}$ .

| Sample                                    | $\tau_{vis}$ (380–700 nm) |               |               | $\tau_D$ (589 nm) |               |               |
|-------------------------------------------|---------------------------|---------------|---------------|-------------------|---------------|---------------|
|                                           | $\tau_1^{TS}$             | $\tau_1^{DT}$ | $\tau_1^{DR}$ | $\tau_D^{TS}$     | $\tau_D^{DT}$ | $\tau_D^{DR}$ |
| L-PPSQ-322                                | 0.95                      | 0.99          | 0.99          | 0.98              | 0.99          | 0.99          |
| L-PPSQ-322 [ox]                           | 0.96                      | 0.99          | 0.97          | 0.98              | 0.99          | 0.97          |
| L-PPSQ-322-Nb-[(SiO) <sub>x</sub> ]       | 0.34                      | 0.95          | 0.97          | 0.61              | 0.95          | 0.98          |
| L-PPSQ-322-Nb-[(SiO) <sub>x</sub> ] [ox]  | 0.38                      | 0.95          | 0.94          | 0.65              | 0.95          | 0.97          |
| L-PPSQ-1060                               | 0.78                      | 0.89          | 0.89          | 0.87              | 0.90          | 0.92          |
| L-PPSQ-1060 [ox]                          | 0.73                      | 0.88          | 0.91          | 0.86              | 0.89          | 0.93          |
| L-PPSQ-1060-Nb-[(SiO) <sub>x</sub> ]      | 0.55                      | 0.95          | 0.95          | 0.83              | 0.95          | 0.97          |
| L-PPSQ-1060-Nb-[(SiO) <sub>x</sub> ] [ox] | 0.54                      | 0.95          | 0.3           | 0.83              | 0.96          | 0.97          |
| PDMS-Nb-[(SiO) <sub>x</sub> ]             | 0.90                      | 0.93          | 0.93          | 0.93              | 0.99          | 0.97          |

The “[ox]” index denotes the samples exposed by atomic oxygen.

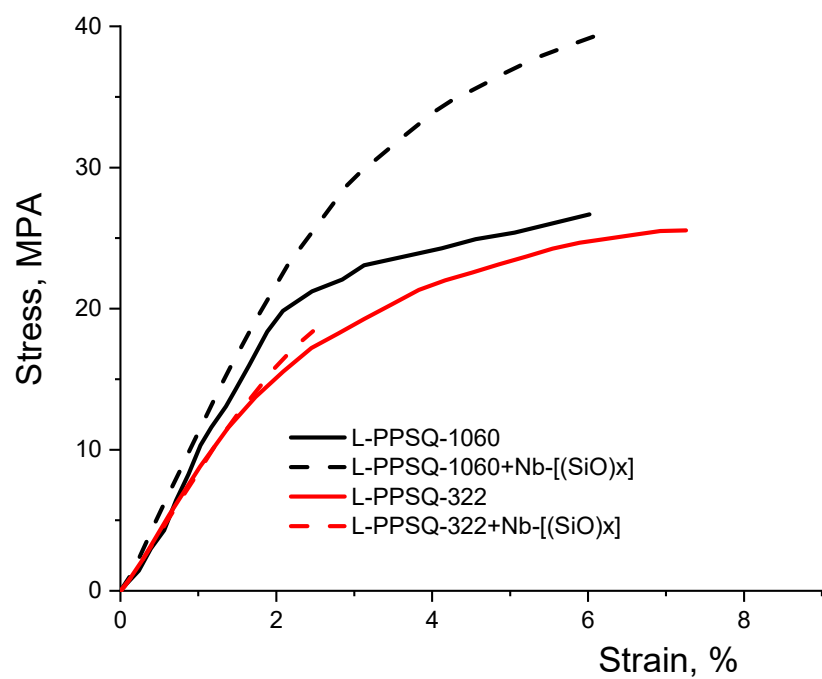

**Figure S1.** The stress - strain curves of the samples studied after AO irradiation.
